# Supplementary material for: StM171, a Stenotrophomonas maltophilia Bacteriophage That Affects Sensitivity to Antibiotics in Host Bacteria and Their Biofilm Formation
Source: MDPI journal article supplement (doi:10.3390/v15122455), 2023-12-18
Supplement: s1 [file s1]

**Table S1.** List of tested *Stenotrophomonas maltophilia* and *Pseudomonas aeruginosa* strains in STM171 host range experiment

|                                     | Strain number | Susceptibility to StM171 phage | GenBank accession |
|-------------------------------------|---------------|--------------------------------|-------------------|
| <i>Stenotrophomonas maltophilia</i> |               |                                |                   |
| 1                                   | 2142          | +                              | MZ424754          |
| 2                                   | 2355          | +                              | OP393915          |
| 3                                   | 3659          | +                              | MT040043          |
| 4                                   | 3664          | +                              | MT040044          |
| 5                                   | 3670          | +                              | MT040045          |
| 6                                   | 3672          | -                              | MT040046          |
| 7                                   | 3773          | -                              | MZ424763          |
| 8                                   | 3806          | -                              | MZ424764          |
| 9                                   | 3963          | -                              | MZ424756          |
| 10                                  | 4125          | -                              | MZ424762          |
| <i>Pseudomonas aeruginosa</i>       |               |                                |                   |
| 1                                   | 1125          | -                              | OP800156          |
| 2                                   | 1589          | -                              | OP800159          |
| 3                                   | 1697          | -                              | OP541579          |
| 4                                   | 1699          | -                              | OR140575          |
| 5                                   | 1710          | -                              | OR140576          |
| 6                                   | 1711          | -                              | OR140576          |
| 7                                   | 1779          | -                              | OP541582          |
| 8                                   | 2273          | -                              | OP602241          |
| 9                                   | 2887          | -                              | OR140577          |
| 10                                  | 2888          | -                              | OR140577          |
| 11                                  | 3217          | -                              | OR140578          |
| 12                                  | 3218          | -                              | OR140578          |
| 13                                  | 3414          | -                              | OR140579          |
| 14                                  | 3416          | -                              | OR140580          |
| 15                                  | 3451          | -                              | OR140581          |
| 16                                  | 3532          | -                              | OP541585          |
| 17                                  | 3536          | -                              | OP541586          |
| 18                                  | 3671          | -                              | MT040050          |
| 19                                  | 3823          | -                              | OP541588          |
| 20                                  | 3931          | -                              | OP541589          |
| 21                                  | 3935          | -                              | OP602243          |
| 22                                  | 3940          | -                              | OP541590          |
| 23                                  | 3943          | -                              | OP541591          |
| 24                                  | 3946          | -                              | OP541592          |
| 25                                  | 3962          | -                              | OP541593          |
| 26                                  | 4147          | -                              | OP541595          |
