# Supplementary material for: StM171, a Stenotrophomonas maltophilia Bacteriophage That Affects Sensitivity to Antibiotics in Host Bacteria and Their Biofilm Formation
Source: MDPI journal article supplement (doi:10.3390/v15122455), 2023-12-18
Supplement: s1 [file s1]

**Table S4.** Primers used for PCR screening for StM171 genome inside bacterial hosts

| Targeted gene      | Orientation | primer ID  | Sequence                  | Location    |
|--------------------|-------------|------------|---------------------------|-------------|
| Tail assembly gene | Forward     | Frdtail171 | 5'CACCTACAACCCCGCCTATC 3' | 5682-5071   |
| Tail assembly gene | Reverse     | Revtail171 | 5'CAGGTTCTCCAGCACACAGT 3' | 6275-6294   |
| Capsid gene        | Forward     | Frdcap171  | 5'CGGCCAACTACAACCACCAT 3' | 37151-37170 |
| Capsid gene        | Reverse     | Revcap171  | 5'TTGGACTGGATGACCTCGC 3'  | 37640-37658 |
