# Supplementary material for: StM171, a Stenotrophomonas maltophilia Bacteriophage That Affects Sensitivity to Antibiotics in Host Bacteria and Their Biofilm Formation
Source: MDPI journal article supplement (doi:10.3390/v15122455), 2023-12-18
Supplement: s1 [file s1]

**Table S3.** Minimum inhibitory concentrations for antibiotics used in biofilm study

| <i>Stenotrophomonas maltophilia</i> strain | Ampicillin | Gentamicin | Levofloxacin | Tetracycline | Chloramphenicol |
|--------------------------------------------|------------|------------|--------------|--------------|-----------------|
| <b>CEMTC 2142</b>                          | Resistant  | 20         | 5            | 15           | 7.5             |
| <b>CEMTC 2355</b>                          | Resistant  | 20         | 5            | 15           | 7.5             |
| <b>CEMTC 3659</b>                          | Resistant  | 20         | 5            | 15           | 7.5             |
| <b>CEMTC 3664</b>                          | Resistant  | 20         | 5            | 15           | 7.5             |
| <b>CEMTC 3670</b>                          | Resistant  | 20         | 5            | 15           | 7.5             |

Concentrations are given in µg/mL
