# Supplementary material for: StM171, a Stenotrophomonas maltophilia Bacteriophage That Affects Sensitivity to Antibiotics in Host Bacteria and Their Biofilm Formation
Source: MDPI journal article supplement (doi:10.3390/v15122455), 2023-12-18
Supplement: s1 [file s1]

**Table S2.** Antibiotics tested in the against StM171 bacterial hosts

|    | Antibiotic                           | Class                          | Concentration (µg/disk) | CEMTC2142   | CEMTC2355   | CEMTC3659   | CEMTC3664   | CEMTC3670   |
|----|--------------------------------------|--------------------------------|-------------------------|-------------|-------------|-------------|-------------|-------------|
| 1  | Gentamicin                           | aminoglycoside                 | 10                      | susceptible | susceptible | susceptible | susceptible | susceptible |
| 2  | Amikacin                             | aminoglycoside                 | 30                      | susceptible | susceptible | susceptible | susceptible | susceptible |
| 3  | Ampicillin                           | beta-lactam                    | 10                      | resistant   | resistant   | resistant   | resistant   | resistant   |
| 4  | Amoxicillin                          | beta-lactam                    | 30                      | resistant   | resistant   | susceptible | susceptible | susceptible |
| 5  | Ampicillin-sulbactam                 | beta-lactamase inhibitor       | 20                      | resistant   | resistant   | resistant   | resistant   | resistant   |
| 6  | Piperacillin / Tazobactam 30:10      | Beta-lactam (Ureidopenicillin) | 40                      | susceptible | susceptible | susceptible | susceptible | resistant   |
| 7  | Aztreonam                            | beta-lactam                    | 30                      | resistant   | resistant   | resistant   | resistant   | resistant   |
| 8  | Imipenem                             | beta-lactam                    | 10                      | resistant   | resistant   | resistant   | resistant   | resistant   |
| 9  | Meropenem                            | beta-lactam                    | 10                      | resistant   | resistant   | resistant   | resistant   | resistant   |
| 10 | Cefoxitin                            | beta-lactam                    | 30                      | resistant   | resistant   | resistant   | resistant   | resistant   |
| 11 | Ceftazidime                          | beta-lactam                    | 10                      | susceptible | resistant   | resistant   | resistant   | susceptible |
| 12 | Cefepime                             | beta-lactam                    | 30                      | susceptible | resistant   | resistant   | resistant   | resistant   |
| 13 | chloramphenicol                      | Phenicol                       | 30                      | susceptible | susceptible | susceptible | susceptible | susceptible |
| 14 | Levofloxacin                         | Fluorquinolone                 | 5                       | susceptible | susceptible | susceptible | susceptible | susceptible |
| 15 | Ciprofloxacin                        | Fluorquinolone                 | 5                       | susceptible | susceptible | susceptible | susceptible | susceptible |
| 16 | Clindamycin                          | Lincosamide                    | 2                       | resistant   | resistant   | resistant   | resistant   | resistant   |
| 17 | Linezolid                            | oxazolidinone                  | 10                      | resistant   | resistant   | resistant   | resistant   | resistant   |
| 18 | Erythromycin                         | macrolide                      | 15                      | resistant   | susceptible | susceptible | susceptible | susceptible |
| 19 | Penicillin                           | beta-lactam                    | 1 unit                  | resistant   | resistant   | resistant   | resistant   | resistant   |
| 20 | Oxacillin                            | beta-lactam                    | 1                       | resistant   | resistant   | resistant   | resistant   | resistant   |
| 21 | Tetracycline                         | tetracycline                   | 30                      | susceptible | susceptible | susceptible | susceptible | susceptible |
| 22 | Tetracycline / Clavulanic acid 75/10 | tetracycline                   | 85                      | susceptible | susceptible | susceptible | susceptible | susceptible |
| 23 | Trimethoprim/sulfamethoxazole        | Diaminopyrimidine              | 25                      | susceptible | susceptible | susceptible | susceptible | susceptible |
